# Supplementary material
Source: MDPI journal article supplement (https://www.mdpi.com/2312-7481/9/5/113)
Supplement: s1 [file s1]

# Supplementary Information for “Spin-topological electronic valve in Ni/hBN-graphene-hBN/Ni magnetic junction”

Yusuf Wicaksono<sup>1,\*</sup>, Halimah Harfah<sup>1</sup>, Gagus Ketut Sunnardianto<sup>2,3,4</sup>, Muhammad Aziz Majidi<sup>2,5</sup>,  
and Koichi Kusakabe<sup>2</sup>

1 Graduate School of Engineering Science, Osaka University, 1-3 Machikaneyama-cho, Osaka, 560-0043, Toyonaka, Japan.

2 School of Science, Graduate School of Science, University of Hyogo, 3-2-1 Kouto, Kamigori-cho, Ako-gun, 678-1297, Hyogo, Japan.

3 Research Center for Quantum Physics, The National Research and Innovation Agency Republic of Indonesia (BRIN), Kawasan Puspiptek Serpong, Tangerang Selatan, 15314, Banten, Indonesia.

4 Research Collaboration Center for Quantum Technology 2.0, Bandung 40132, Indonesia.

5 Department of Physics, Faculty of Mathematics and Natural Science, Universitas Indonesia, Kampus UI Depok, Jawa Barat, 16424, Depok, Indonesia.

\* Correspondence: [wicaksono.y@opt.mp.es.osaka-u.ac.jp](mailto:wicaksono.y@opt.mp.es.osaka-u.ac.jp)

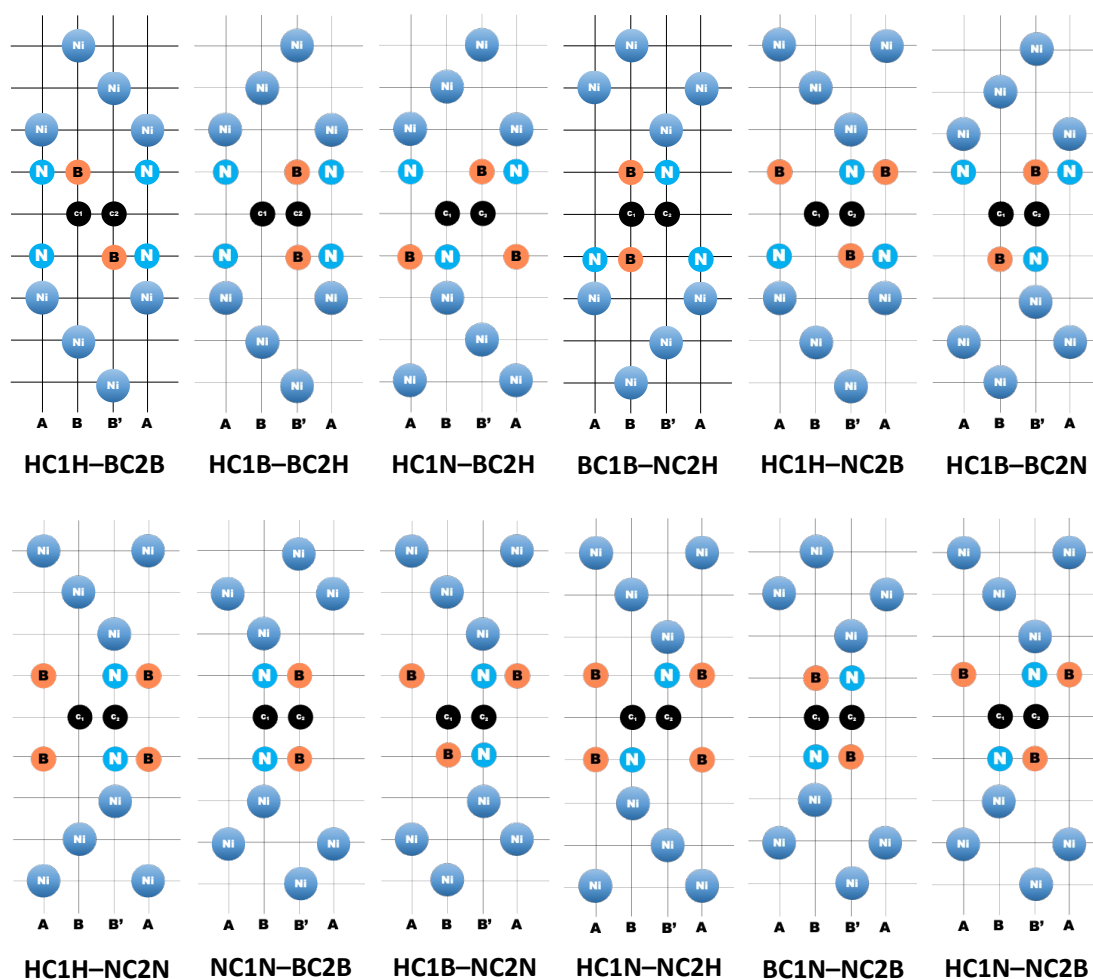

Figure S1. The multi-stack diagrams of the twelve proposed stacking configurations.

Table S1. The atomic coordinates in a fractional unit of the hexagonal/trigonal pyramid unit cell for stacking configurations HC1H-BC2B, HC1B-BC2H, and HC1N-BC2H with lattice constant  $a=2.461 \text{ \AA}$  and  $c=100 \text{ \AA}$ .

| Atom Name | Stacking Configurations |            |            |            |            |            |            |            |            |
|-----------|-------------------------|------------|------------|------------|------------|------------|------------|------------|------------|
|           | HC1H-BC2B               |            |            | HC1B-BC2H  |            |            | HC1N-BC2H  |            |            |
|           | x                       | y          | z          | x          | y          | z          | x          | y          | z          |
| Ni        | 0.66666667              | 0.33333333 | 0.58470055 | 0.33333333 | 0.66666667 | 0.58469705 | 0.33333333 | 0.66666667 | 0.58502599 |
| Ni        | 0.33333333              | 0.66666667 | 0.56625904 | 0.66666667 | 0.33333333 | 0.56625573 | 0.66666667 | 0.33333333 | 0.56658494 |
| Ni        | 0.00000000              | 0.00000000 | 0.54733127 | 0.00000000 | 0.00000000 | 0.54732861 | 0.00000000 | 0.00000000 | 0.54765820 |
| B         | 0.66666667              | 0.33333333 | 0.52846737 | 0.33333333 | 0.66666667 | 0.52845971 | 0.33333333 | 0.66666667 | 0.52877234 |
| N         | 0.00000000              | 0.00000000 | 0.52711938 | 0.00000000 | 0.00000000 | 0.52711742 | 0.00000000 | 0.00000000 | 0.52744897 |
| C1        | 0.33333333              | 0.66666667 | 0.50000036 | 0.66666667 | 0.33333333 | 0.49999518 | 0.66666667 | 0.33333333 | 0.50034257 |
| C2        | 0.66666667              | 0.33333333 | 0.50000034 | 0.33333333 | 0.66666667 | 0.50000515 | 0.33333333 | 0.66666667 | 0.50036585 |
| N         | 0.00000000              | 0.00000000 | 0.47288093 | 0.00000000 | 0.00000000 | 0.47288225 | 0.66666667 | 0.33333333 | 0.47241379 |
| B         | 0.66666667              | 0.33333333 | 0.47153294 | 0.66666667 | 0.33333333 | 0.47154005 | 0.00000000 | 0.00000000 | 0.47098310 |
| Ni        | 0.00000000              | 0.00000000 | 0.45266898 | 0.00000000 | 0.00000000 | 0.45267096 | 0.66666667 | 0.33333333 | 0.45223262 |
| Ni        | 0.33333333              | 0.66666667 | 0.43374116 | 0.33333333 | 0.66666667 | 0.43374370 | 0.33333333 | 0.66666667 | 0.43329472 |
| Ni        | 0.66666667              | 0.33333333 | 0.41529965 | 0.66666667 | 0.33333333 | 0.41530231 | 0.00000000 | 0.00000000 | 0.41485876 |

Table S2. The atomic coordinates in a fractional unit of the hexagonal/trigonal pyramid unit cell for stacking configurations BC1B-NC2H, HC1H-NC2B, and HC1B-BC2N with lattice constant  $a=2.461 \text{ \AA}$  and  $c=100 \text{ \AA}$ .

| Atom Name | Stacking Configurations |            |            |            |            |            |            |            |            |
|-----------|-------------------------|------------|------------|------------|------------|------------|------------|------------|------------|
|           | BC1B-NC2H               |            |            | HC1H-NC2B  |            |            | HC1B-BC2N  |            |            |
|           | x                       | y          | z          | x          | y          | z          | x          | y          | z          |
| Ni        | 0.66666674              | 0.33333314 | 0.58530915 | 0.00000000 | 0.00000000 | 0.58518782 | 0.33333333 | 0.66666667 | 0.58514739 |
| Ni        | 0.00000003              | 0.00000008 | 0.56687079 | 0.66666667 | 0.33333333 | 0.56675129 | 0.66666667 | 0.33333333 | 0.56670643 |
| Ni        | 0.33333333              | 0.66666675 | 0.54793467 | 0.33333333 | 0.66666667 | 0.54781297 | 0.00000000 | 0.00000000 | 0.54778025 |
| B         | 0.66666628              | 0.3333344  | 0.52915234 | 0.00000000 | 0.00000000 | 0.52904607 | 0.33333333 | 0.66666667 | 0.52889742 |
| N         | 0.33333371              | 0.66666564 | 0.52775856 | 0.33333333 | 0.66666667 | 0.52762802 | 0.00000000 | 0.00000000 | 0.52757066 |
| C1        | 0.66666699              | 0.33333244 | 0.49954104 | 0.66666667 | 0.33333333 | 0.49963387 | 0.66666667 | 0.33333333 | 0.50045858 |
| C2        | 0.33333301              | 0.66666756 | 0.49956597 | 0.33333333 | 0.66666667 | 0.49964553 | 0.33333333 | 0.66666667 | 0.50044897 |
| N         | 0.00000037              | 0.00000102 | 0.47245332 | 0.00000000 | 0.00000000 | 0.47252510 | 0.33333333 | 0.66666667 | 0.47222794 |
| B         | 0.66666706              | 0.33333226 | 0.47113204 | 0.33333333 | 0.66666667 | 0.47119183 | 0.66666667 | 0.33333333 | 0.47084671 |
| Ni        | 0.00000003              | 0.00000009 | 0.4522438  | 0.00000000 | 0.00000000 | 0.45231630 | 0.33333333 | 0.66666667 | 0.45205295 |
| Ni        | 0.33333336              | 0.66666659 | 0.43331786 | 0.66666667 | 0.33333333 | 0.43338983 | 0.00000000 | 0.00000000 | 0.43311870 |
| Ni        | 0.66666659              | 0.33333353 | 0.41487639 | 0.33333333 | 0.66666667 | 0.41494880 | 0.66666667 | 0.33333333 | 0.41468041 |

Table S3. The atomic coordinates in a fractional unit of the hexagonal/trigonal pyramid unit cell for stacking configurations HC1H-NC2N, NC1N-BC2B, and HC1B-NC2N with lattice constant  $a=2.461 \text{ \AA}$  and  $c=100 \text{ \AA}$ .

| Atom Name | Stacking Configurations |            |            |            |            |            |            |            |            |
|-----------|-------------------------|------------|------------|------------|------------|------------|------------|------------|------------|
|           | HC1H-NC2N               |            |            | NC1N-BC2B  |            |            | HC1B-NC2N  |            |            |
|           | x                       | y          | z          | x          | y          | z          | x          | y          | z          |
| Ni        | 0.00000000              | 0.00000000 | 0.58547420 | 0.33333333 | 0.66666667 | 0.58568404 | 0.00000000 | 0.00000000 | 0.58556593 |
| Ni        | 0.33333333              | 0.66666667 | 0.56703822 | 0.00000000 | 0.00000000 | 0.56724503 | 0.66666667 | 0.33333333 | 0.56712969 |
| Ni        | 0.66666667              | 0.33333333 | 0.54810144 | 0.66666667 | 0.33333333 | 0.54831052 | 0.33333333 | 0.66666667 | 0.54819301 |
| B         | 0.00000000              | 0.00000000 | 0.52933097 | 0.33333333 | 0.66666667 | 0.52950771 | 0.00000000 | 0.00000000 | 0.52942490 |
| N         | 0.66666667              | 0.33333333 | 0.52791885 | 0.66666667 | 0.33333333 | 0.52813672 | 0.33333333 | 0.66666667 | 0.52800998 |
| C1        | 0.33333333              | 0.66666667 | 0.50000058 | 0.66666667 | 0.33333333 | 0.49999951 | 0.66666667 | 0.33333333 | 0.50009067 |
| C2        | 0.66666667              | 0.33333333 | 0.50000046 | 0.33333333 | 0.66666667 | 0.49999941 | 0.33333333 | 0.66666667 | 0.50009374 |
| N         | 0.66666667              | 0.33333333 | 0.47208149 | 0.66666667 | 0.33333333 | 0.47186232 | 0.33333333 | 0.66666667 | 0.47193937 |
| B         | 0.00000000              | 0.00000000 | 0.47066939 | 0.33333333 | 0.66666667 | 0.47049156 | 0.66666667 | 0.33333333 | 0.47057187 |
| Ni        | 0.66666667              | 0.33333333 | 0.45189892 | 0.66666667 | 0.33333333 | 0.45168872 | 0.33333333 | 0.66666667 | 0.45176451 |
| Ni        | 0.33333333              | 0.66666667 | 0.43296198 | 0.00000000 | 0.00000000 | 0.43275384 | 0.00000000 | 0.00000000 | 0.43282984 |
| Ni        | 0.00000000              | 0.00000000 | 0.41452595 | 0.33333333 | 0.66666667 | 0.41431467 | 0.66666667 | 0.33333333 | 0.41439068 |

Table S4. The atomic coordinates in a fractional unit of the hexagonal/trigonal pyramid unit cell for stacking configurations HC1N-NC2H, BC1N-NC2B, and HC1N-NC2B with lattice constant  $a=2.461 \text{ \AA}$  and  $c=100 \text{ \AA}$ .

| Atom Name | Stacking Configurations |             |             |             |             |            |             |             |            |
|-----------|-------------------------|-------------|-------------|-------------|-------------|------------|-------------|-------------|------------|
|           | HC1N-NC2H               |             |             | BC1N-NC2B   |             |            | HC1N-NC2B   |             |            |
|           | x                       | y           | z           | x           | y           | z          | x           | y           | z          |
| Ni        | 0.000000000             | 0.000000000 | 0.585559317 | 0.666666667 | 0.333333333 | 0.58579038 | 0.000000000 | 0.000000000 | 0.58567352 |
| Ni        | 0.333333333             | 0.666666667 | 0.567122704 | 0.000000000 | 0.000000000 | 0.56735224 | 0.666666667 | 0.333333333 | 0.56723728 |
| Ni        | 0.666666667             | 0.333333333 | 0.548185457 | 0.333333333 | 0.666666667 | 0.54841930 | 0.333333333 | 0.666666667 | 0.54830068 |
| B         | 0.000000000             | 0.000000000 | 0.529409526 | 0.666666667 | 0.333333333 | 0.52962001 | 0.000000000 | 0.000000000 | 0.52952368 |
| N         | 0.666666667             | 0.333333333 | 0.528002366 | 0.333333333 | 0.666666667 | 0.52825016 | 0.333333333 | 0.666666667 | 0.52812014 |
| C1        | 0.333333333             | 0.666666667 | 0.499986945 | 0.666666667 | 0.333333333 | 0.49998644 | 0.666666667 | 0.333333333 | 0.50006985 |
| C2        | 0.666666667             | 0.333333333 | 0.500012968 | 0.333333333 | 0.666666667 | 0.50001256 | 0.333333333 | 0.666666667 | 0.50009727 |
| N         | 0.333333333             | 0.666666667 | 0.471997466 | 0.666666667 | 0.333333333 | 0.47174869 | 0.666666667 | 0.333333333 | 0.47184025 |
| B         | 0.000000000             | 0.000000000 | 0.470590312 | 0.333333333 | 0.666666667 | 0.47037868 | 0.333333333 | 0.666666667 | 0.47046522 |
| Ni        | 0.333333333             | 0.666666667 | 0.451814343 | 0.666666667 | 0.333333333 | 0.45157937 | 0.666666667 | 0.333333333 | 0.45166857 |
| Ni        | 0.666666667             | 0.333333333 | 0.432877089 | 0.000000000 | 0.000000000 | 0.43264632 | 0.000000000 | 0.000000000 | 0.43273418 |
| Ni        | 0.000000000             | 0.000000000 | 0.414440452 | 0.333333333 | 0.666666667 | 0.41420813 | 0.333333333 | 0.666666667 | 0.41429546 |
